# Supplementary material
Source: Springer Nature journal article supplement (https://www.springermedizin.de/resource/supplementary/12971_2012_169_MOESM7_ESM.pdf/9595070)

**(A)**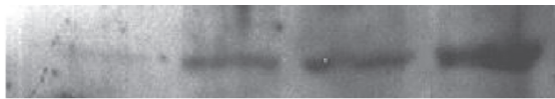**Controls****5% CSE****10% CSE****15% CSE****(B)**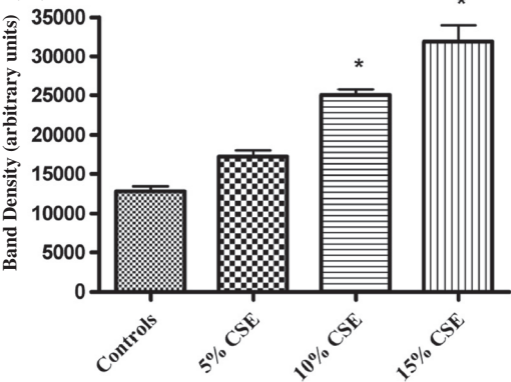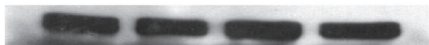 **$\beta$ -Actin loading control**

Supplement: MOESM7 [file 9595070]
